# Supplementary material for: Assessment of Prevalence and Cost of Care Cascades After Routine Testing During the Medicare Annual Wellness Visit
Source: PubMed Central journal article supplement (PMC7733154; doi:10.1001/jamanetworkopen.2020.29891), 2020-12-11
Supplement: jamanetwopen-e2029891-s001.pdf [file jamanetwopen-e2029891-s001.pdf]

## Supplementary Online Content

Ganguli I, Lupo C, Mainor AJ, Wang Q, Orav EJ, Rosenthal MB, Sequist TD, Colla CH.

Assessment of prevalence and cost of care cascades after routine testing during the Medicare annual wellness visit. *JAMA Netw Open*. 2020;3(12):e2029891.

doi:10.1001/jamanetworkopen.2020.29891

### **eAppendix 1.** Relevant Choosing Wisely Recommendations

**eFigure 1.** Study Timeline

**eFigure 2.** Study Cohort Flow Diagram

**eTable 1.** Excluding Diagnoses

**eAppendix 2.** Index Event Definition

**eTable 2.** Index Test Codes

**eAppendix 3.** Cascade Event Definition

**eTable 3.** Cascade Laboratory Tests, Imaging Tests, and Procedures

**eTable 4.** Cascade Visits

**eTable 5.** Cascade Hospitalizations

**eTable 6.** Cascade New Diagnoses

**eTable 7.** Primary Care Physician Specialty Codes

**eAppendix 4.** Cascade-Attributable Event Analysis

**eTable 8.** Prevalence of Routine Tests Among Annual Wellness Visits, by Problem Based Visit Co-Billed Status

**eFigure 3.** Physician Test Ordering Patterns

**eTable 9.** Cascade-Attributable Event Rates and Spending Following Routine Testing During Annual Wellness Visits, Sensitivity Analysis in Which Index Tests Included as Cascade Events

**eTable 10.** Cascade-Attributable Event Rates and Spending Following Routine Testing During Annual Wellness Visits, Sensitivity Analysis Adjusted for Receipt of Other Routine Tests

**eTable 11.** Index Test and Cascade-Attributable Event Rates Following Routine Testing During Annual Wellness Visits, Sensitivity Analysis Using Test-Specific Cohorts

### **eReferences**

## eAppendix 1. Relevant Choosing Wisely recommendations

***Society of General Internal Medicine:* For asymptomatic adults without a chronic medical condition, mental health problem, or other health concern, don't routinely perform annual general health checks that include a comprehensive physical examination and lab testing. Adults should talk with a trusted doctor about how often they should be seen to maintain an effective doctor-patient relationship, attend to preventive care, and facilitate timely recognition of new problems.**

Visit intervals should be based on specific concerns, chronic conditions, or prevention strategies based on the best available evidence, tailored to age and risk. A general health check may help to foster a trusting relationship between a doctor and patient. It may also provide an opportunity for preventive counseling and screening. However, it is not always necessary to have a general health check every year. In contrast to office visits for acute illness, specific evidence-based preventive strategies, or chronic care management such as treatment of high blood pressure, annually scheduled general health checks, including the "health maintenance" visit, have not been shown to reduce morbidity, hospitalizations, or mortality, and may increase the frequency of non-evidence based testing.<sup>1</sup>

**Health Checkups: Tests and screenings can cause problems.**

Most people should only have a test or screening if they have symptoms or risks factors. One problem is getting a false-positive result. These false alarms can cause anxiety, and unnecessary follow-up tests and treatments. For example, a false-positive blood test can result in a biopsy. An ECG that is not interpreted correctly may lead to another test that exposes you to radiation. Or you might get a procedure that has a risk of heart attack or death in two patients for every 100 who get the test.<sup>2</sup>

eMethods

eFigure 1. Study timeline

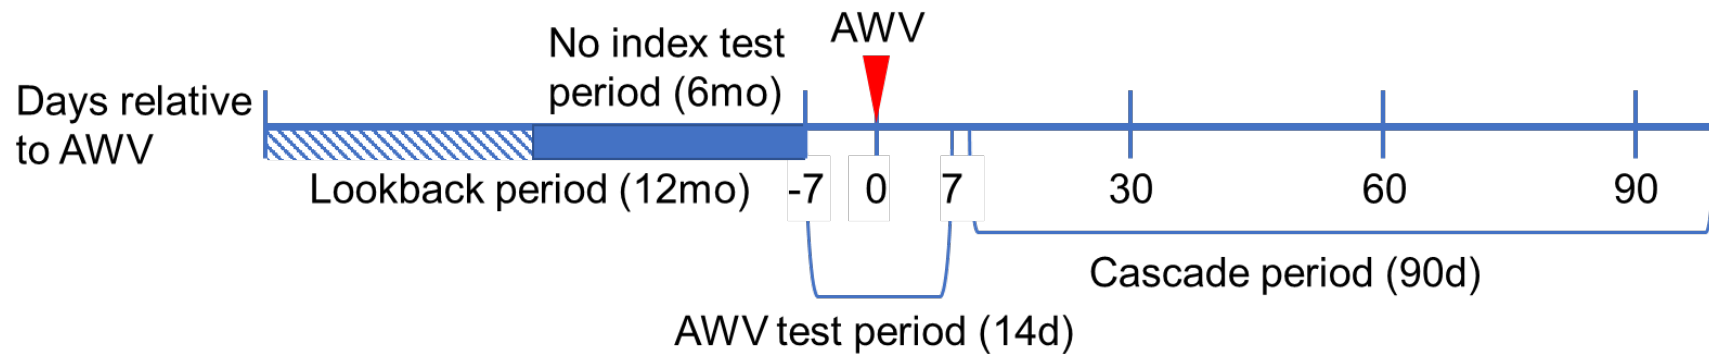

Abbreviation: AWV, Annual Wellness Visit

**eFigure 2.** Study cohort flow diagram

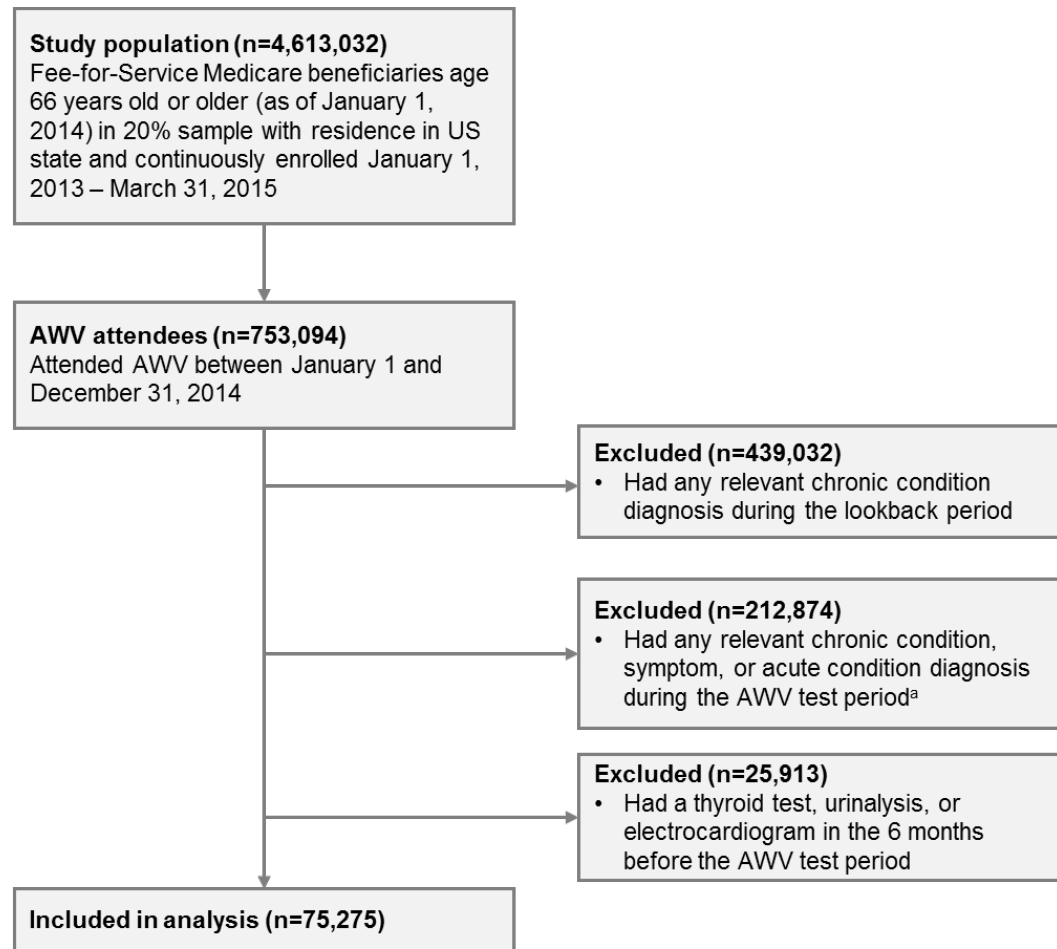

Abbreviation: AWV, Annual Wellness Visit

<sup>a</sup> AWV test period = 7 days before or after AWV

**Definition of Annual Wellness Visit (AWV)** – Yearly appointment with primary care provider to create or update personalized prevention plan and perform a health risk assessment. One AWV is covered by Medicare every 12 months for beneficiaries who are no longer within 12 months after the beneficiary’s Medicare Part B benefits eligibility date.<sup>2</sup>

**Diagnosis-based exclusions** - We excluded beneficiaries with a relevant chronic condition if the diagnosis code was present in one inpatient or two outpatient claims in the prior year OR in any claim during the AWV test period. We excluded beneficiaries with a relevant symptom or acute condition if the diagnosis code was present in any claim during the AWV test period. See eTable 1 for codes.

**eTable 1.** Excluding diagnosis codes

| Test | Diagnosis type                | Diagnoses                                                                                                                           | ICD-9 codes                                                                                                                                                                                                                                                                                                                                                                                                                                       |
|------|-------------------------------|-------------------------------------------------------------------------------------------------------------------------------------|---------------------------------------------------------------------------------------------------------------------------------------------------------------------------------------------------------------------------------------------------------------------------------------------------------------------------------------------------------------------------------------------------------------------------------------------------|
| ECG  | Chronic conditions            | Hypertension (CCW)                                                                                                                  | 362.11, 401.0-1, 401.9, 402.00-01, 402.10-11, 402.90-91, 403.00-01, 403.10-11, 403.90-91, 404.00-03, 404.10-13-93, 405.01, 405.09, 405.11, 405.19, 405.91, 405.99, 437.2                                                                                                                                                                                                                                                                          |
|      |                               | Ischemic heart disease (CCW)                                                                                                        | 410, 410.0-01, 410.00-02, 410.10-2, 410.20-22, 410.30-32, 410.40-42, 410.50-52, 410.60-62, 410.70-72, 410.80-82, 410.90-92, 411.0-1, 411.81, 411.89, 412, 413.0-1, 413.9, 414.00-07, 414.10-12, 414.19, 414.2-4, 414.8-9                                                                                                                                                                                                                          |
|      |                               | Heart failure (CCW)                                                                                                                 | 398.91, 402.01, 402.11, 402.91, 404.01, 404.03, 404.11, 404.13, 404.91, 404.93, 428.0-1, 428.9, 428.20-23, 428.30-33, 428.40-43                                                                                                                                                                                                                                                                                                                   |
|      |                               | Valvular disease (CCW)                                                                                                              | 394.0-2, 394.9, 395.0-2, 395.9, 396.0-3, 396.8-9, 397.1, 397.9, 421.2, 424.0-3                                                                                                                                                                                                                                                                                                                                                                    |
|      |                               | Arrhythmia (CCW)                                                                                                                    | 426.0, 426.2-7, 426.10-13, 426.50-4, 426.81-2, 426.89, 426.9, 427.0-2, 427.9, 427.31-2, 427.41-2, 427.60-1, 427.69, 427.81, 427.89, V45.01                                                                                                                                                                                                                                                                                                        |
|      | Symptoms and acute conditions | Chest pain                                                                                                                          | 786.50-2, 786.59                                                                                                                                                                                                                                                                                                                                                                                                                                  |
|      |                               | Dyspnea                                                                                                                             | 786.00-7, 786.09                                                                                                                                                                                                                                                                                                                                                                                                                                  |
|      |                               | Hypotension                                                                                                                         | 458.9                                                                                                                                                                                                                                                                                                                                                                                                                                             |
|      |                               | Bradycardia                                                                                                                         | 427.89                                                                                                                                                                                                                                                                                                                                                                                                                                            |
|      |                               | Nausea                                                                                                                              | 787.01-03                                                                                                                                                                                                                                                                                                                                                                                                                                         |
|      |                               | Unconsciousness, syncope                                                                                                            | 780.09, 780.2                                                                                                                                                                                                                                                                                                                                                                                                                                     |
|      |                               | Dizziness                                                                                                                           | 780.4                                                                                                                                                                                                                                                                                                                                                                                                                                             |
|      |                               | Tachycardia, palpitations                                                                                                           | 785.0-1                                                                                                                                                                                                                                                                                                                                                                                                                                           |
|      |                               | Lower extremity edema                                                                                                               | 782.3                                                                                                                                                                                                                                                                                                                                                                                                                                             |
|      | Nonspecific abnormal ECG      | 794.31                                                                                                                              |                                                                                                                                                                                                                                                                                                                                                                                                                                                   |
| UA   | Chronic conditions            | Acute/chronic kidney disease (CCW)                                                                                                  | 016.00-06, 095.4, 189.0, 189.9, 223.0, 236.91, 249.40-41, 250.40-43, 271.4, 274.10, 283.11, 403.01, 403.11, 403.91, 404.02-03, 404.12-13, 404.92-93, 440.1, 442.1, 572.4, 580.0, 580.4, 580.81, 580.89, 580.9, 581.0-3, 581.81, 581.89, 581.9, 582.0-2, 582.4, 582.81, 582.89, 582.9, 583.0-2, 583.4, 583.6-7, 583.81, 583.89, 583.9, 584.5-9, 585.1-6, 585.9, 586, 587, 588.0-1, 588.81, 588.89, 588.9, 591, 753.12-17, 753.19-23, 753.29, 794.4 |
|      |                               | Hypertension                                                                                                                        | As above                                                                                                                                                                                                                                                                                                                                                                                                                                          |
|      |                               | Nephrolithiasis, ureteral calculus                                                                                                  | 592.0-1                                                                                                                                                                                                                                                                                                                                                                                                                                           |
|      |                               | Benign prostatic hyperplasia                                                                                                        | 600.00-1, 600.10-1, 600.20-1, 600.3, 600.90-1                                                                                                                                                                                                                                                                                                                                                                                                     |
|      |                               | Glomerulonephrosis, glomerulonephritis, neurogenic bladder, indwelling urinary catheter, spinal cord injury, prior renal transplant | 581.1, 582.1, 596.54, 57.94, 952.0-9, V42.0                                                                                                                                                                                                                                                                                                                                                                                                       |

|                                              |                               |                                                                                                                                            |                                                                                                                                                                                                                                                               |
|----------------------------------------------|-------------------------------|--------------------------------------------------------------------------------------------------------------------------------------------|---------------------------------------------------------------------------------------------------------------------------------------------------------------------------------------------------------------------------------------------------------------|
|                                              | Symptoms and acute conditions | Flank pain/renal colic                                                                                                                     | 788.0, 789.0                                                                                                                                                                                                                                                  |
|                                              |                               | Urinary tract infection (including pyelonephritis, cystitis)                                                                               | 590.80, 595.0, 599.0, 112.2                                                                                                                                                                                                                                   |
|                                              |                               | Hematuria, hematospermia, dysuria, urinary frequency, excessive urination, nocturia, urinary urgency, hesitancy, pus in urine, proteinuria | 599.70, 608.82, 788.1, 788.41, 788.43, 788.63-4, 791.9, 791.0                                                                                                                                                                                                 |
|                                              |                               | Urethritis, prostatitis, epididymitis, pelvic infection                                                                                    | 597.80, 601.9, 604.90, 614.9                                                                                                                                                                                                                                  |
| <b>TSH</b>                                   | Chronic conditions            | Goiter, thyrotoxicosis, hyperthyroidism                                                                                                    | 240.0, 240.9, 241.0-1, 241.9, 242.00-01, 242.10-11, 242.20-21, 242.30-31, 242.40-41, 242.80-81, 242.90-91                                                                                                                                                     |
|                                              |                               | Hypothyroidism                                                                                                                             | 243, 244.0-3, 244.8-9                                                                                                                                                                                                                                         |
|                                              |                               | Thyroiditis                                                                                                                                | 245.0-4, 245.8-9                                                                                                                                                                                                                                              |
|                                              |                               | Unspecified disorder of thyroid                                                                                                            | 246.0-3, 246.8-9                                                                                                                                                                                                                                              |
|                                              |                               | Thyroid neoplasm                                                                                                                           | 193, 198.89, 226, 237.4,                                                                                                                                                                                                                                      |
|                                              |                               | Personal history medullary thyroid cancer, FHx other malignancy; personal, family history multiple endocrine neoplasia syndrome            | V10.87, V16.8, V18.11, 258.02-03                                                                                                                                                                                                                              |
|                                              |                               | Diabetes (CCW)                                                                                                                             | 249.00-01, 249.10-11, 249.20-21, 249.30-31, 249.40-41, 249.50-51, 249.60-61, 249.70-71, 249.80-81, 249.90-91, 250.00-03, 250.10-13, 250.20-23, 250.30-33, 250.40-43, 250.50-53, 250.60-63, 250.70-73, 250.80-83, 250.90-93, 357.2, 362.01-06, 366.41          |
|                                              |                               | Anemia (CCW)                                                                                                                               | 280.0-1, 280.8-9, 281.0-4, 281.8-9, 282.0-3, 282.40-47, 282.49, 282.5, 282.60-64, 282.68-69, 282.7-9, 283.0, 283.10-11, 283.19, 283.2, 283.9, 284.01, 284.09, 284.1-12, 284.19, 284.2, 284.81, 284.89, 284.9, 285.0-1, 285.21-22, 285.29, 285.3, 285.8, 285.9 |
|                                              |                               | History of irradiation                                                                                                                     | V15.3, E962.3                                                                                                                                                                                                                                                 |
|                                              | Down's syndrome               | 758.0                                                                                                                                      |                                                                                                                                                                                                                                                               |
|                                              | Symptoms and acute conditions | Muscle weakness, myalgia, chronic fatigue, other malaise and fatigue                                                                       | 728.87, 729.1, 780.71, 780.79                                                                                                                                                                                                                                 |
|                                              |                               | Exophthalmos, ophthalmoplegia                                                                                                              | 376.22                                                                                                                                                                                                                                                        |
|                                              |                               | Abnormal weight gain/loss                                                                                                                  | 783.1-2                                                                                                                                                                                                                                                       |
|                                              |                               | Excessive sweating                                                                                                                         | 780.8                                                                                                                                                                                                                                                         |
| Constipation                                 |                               | 564.00-09                                                                                                                                  |                                                                                                                                                                                                                                                               |
| Neck lump, dysphonia, dysphagia              |                               | 784.2, 784.42, 787.20                                                                                                                      |                                                                                                                                                                                                                                                               |
| Tachycardia, palpitations                    |                               | 427.31, 785.0-1                                                                                                                            |                                                                                                                                                                                                                                                               |
| Abnormal results of thyroid function studies |                               | 794.5                                                                                                                                      |                                                                                                                                                                                                                                                               |
| Heat or cold intolerance                     |                               | 780.99                                                                                                                                     |                                                                                                                                                                                                                                                               |

|  |                                                            |                                                                                                                                                                                                                                                          |
|--|------------------------------------------------------------|----------------------------------------------------------------------------------------------------------------------------------------------------------------------------------------------------------------------------------------------------------|
|  | Hypertension (CCW)                                         | As above                                                                                                                                                                                                                                                 |
|  | Depression (CCW)                                           | 296.20, 296.21, 296.22, 296.23, 296.24, 296.25, 296.26, 296.30, 296.31, 296.32, 296.33, 296.34, 296.35, 296.36, 296.51, 296.52, 296.53, 296.54, 296.55, 296.56, 296.60, 296.61, 296.62, 296.63, 296.64, 296.65, 296.66, 296.89, 298.0, 300.4, 309.1, 311 |
|  | Alzheimer's and related disorders or senile dementia (CCW) | 331.0, 331.11, 331.19, 331.2, 331.7, 290.0, 290.10, 290.11, 290.12, 290.13, 290.20, 290.21, 290.3, 290.40, 290.41, 290.42, 290.43, 294.0, 294.10, 294.11, 294.20, 294.21, 294.8, 797                                                                     |

Abbreviations: ECG, electrocardiogram; UA, urinalysis; TSH, thyrotropin test (also known as thyroid stimulating hormone test). CCW, Medicare Chronic Conditions Warehouse. CCW indicates these diagnosis codes were based on CCW condition categories (<https://www2.ccwdata.org/web/quest/condition-categories>).

## eAppendix 2. Index event definition

**Definition of index event** - Routine lab tests in conjunction with a patient's annual wellness visit (AWV). Defined as routine tests performed within 7 days before or after the AWV.

**eTable 2.** Index test codes

| Test Type | CPT Code                     |
|-----------|------------------------------|
| ECG       | 93000, 93005, 93010, G0403-5 |
| UA        | 81000-3                      |
| TSH       | 84443                        |

## eAppendix 3. Cascade event definitions

**Definition of cascade events** - Follow-up testing, procedures, visits, hospitalizations, and new diagnoses which plausibly follow from the index event that were measured during the cascade period.

**eTable 3.** Cascade laboratory tests, imaging tests, and procedures

### A. Electrocardiogram

| Cascade category | Event                       | Codes                                                                  |
|------------------|-----------------------------|------------------------------------------------------------------------|
| Laboratory tests | Electrolytes                | 80048, 80051, 80053                                                    |
|                  | Brain natriuretic peptide   | 83880                                                                  |
|                  | Troponin                    | 84484                                                                  |
| Imaging          | Rhythm tracing / monitoring | 93040-2, 93224-9, 93268, 93270-2, 93278                                |
|                  | Echocardiogram              | 93303-4, 93306-8, 93313, 93320-1, 93325                                |
|                  | Cardiac MRI, CT             | 75557, 75561, 75565, 75571-4                                           |
|                  | Nuclear medicine imaging    | 78428, 78499, 78472, 78454, 78459, 78466, 78468-9, 78481, 78494, 78496 |

| Cascade category | Event                                                     | Codes                                                                                                                                                                                                                                                                            |
|------------------|-----------------------------------------------------------|----------------------------------------------------------------------------------------------------------------------------------------------------------------------------------------------------------------------------------------------------------------------------------|
| Procedures       | Electrophysiology procedure                               | 33202-3, 33206-8, 33210-8, 33220-31, 33233-8, 33240-1, 33243-4, 33249, 33250-1, 33254-9, 33261-6, 33270-3, 33282, 33284, 92953, 92960-1, 92970-1, 93260-1, 93279-99, 93600, 93602-3, 93609-10, 93612-3, 93615-6, 93618-24, 93640-2, 93644, 93650-4, 93655-7, 93660, 93662, E0616 |
|                  | Valve repair/replacement                                  | 33361-9, 33400-1, 33403, 33405-6, 33410-8, 33420, 33422, 33425-7, 33430, 33460, 33463-5, 33474-5, 33478, 92986-7, 92990, 92992, 0343T                                                                                                                                            |
|                  | Percutaneous coronary angioplasty/cardiac catheterization | 92920-1, 92924-5, 92928-9, 92933-4, 92937-8, 92941, 92943-4, 92973, 92975, 92977, 92980-2, 92984, 92995-6                                                                                                                                                                        |
|                  | Coronary artery repair and bypass graft surgery           | 33500-5, 33507, 33510-4, 33516-9, 33521-3, 33530, 33533-6, 33542, 33545, 33548, 33572, 92978-9                                                                                                                                                                                   |
|                  | Stress test                                               | 75559, 75563, 78414, 7845-3, 78473, 78483, 78491-2, 93015-8, 93024                                                                                                                                                                                                               |
|                  | Transesophageal echocardiography                          | 93312, 93314-8, 93350-2, 93355                                                                                                                                                                                                                                                   |

## B. Urinalysis

| Cascade category | Event                                                              | Codes                                             |
|------------------|--------------------------------------------------------------------|---------------------------------------------------|
| Laboratory tests | Electrolytes and kidney function tests                             | 80051, 80069, 82040, 84300, 84132-3, 84295, 84520 |
|                  | Urine culture                                                      | 87077, 87081, 87086, 87088, 87184-6               |
|                  | Creatine kinase                                                    | 82550                                             |
|                  | Metanephrines                                                      | 83835                                             |
|                  | Protein electrophoresis                                            | 82784, 84155-6, 84165-6, 86334, 83883             |
|                  | Antibody tests (ANCA, ANA, dsDNA, ASM)                             | 86021, 86038-9, 86225, 86235, 86255-6             |
|                  | Tests for infection (including tuberculosis, chlamydia, gonorrhea) | 86481, 86580, 87206, 87491, 87591, 88312-3        |
|                  | Urine cytology                                                     | 88104, 88108, 88112                               |
| Imaging          | Renal angiography                                                  | 36251-4                                           |
|                  | Pelvic CT, MRI                                                     | 72192-7                                           |
|                  | Abdomen and Abdomen/pelvic CT, MRI                                 | 74150, 74160, 74170, 74176-8, 74181-3             |
|                  | Urinary tract X-ray                                                | 74420                                             |
|                  | Retroperitoneal and pelvic ultrasound                              | 76770, 76775, 76856-7                             |
| Procedures       | Liver biopsy                                                       | 47000-1, 47100, 47379, 47700                      |
|                  | Cholecystectomy                                                    | 47562-3                                           |
|                  | Retroperitoneal, renal biopsy                                      | 49180, 50200                                      |
|                  | Nephrectomy                                                        | 50543, 50545, 50548                               |
|                  | Renal laparoscopy                                                  | 50549                                             |
|                  | Lithotripsy                                                        | 50590                                             |
|                  | Litholapaxy                                                        | 52317-8                                           |
|                  | Renal ablation                                                     | 50592                                             |
|                  | Cystourethroscopy                                                  | 52000, 52005, 52204, 52224, 52351-3               |
|                  | Imaging-guided procedure                                           | 76942, 77012, 77021                               |

## C. Thyrotropin test

| Cascade category | Event                 | Codes               |
|------------------|-----------------------|---------------------|
| Laboratory tests | Thyroid function test | 84436, 84439, 84479 |
|                  | Parathyroid hormone   | 83970               |



|                   |                                                 |                                                                 |
|-------------------|-------------------------------------------------|-----------------------------------------------------------------|
|                   | Triiodothyronine T3                             | 84480-1                                                         |
|                   | Microsomal antibody                             | 86376                                                           |
|                   | Thyroglobulin antibody                          | 86800                                                           |
| <b>Imaging</b>    | CT soft tissue neck                             | 70490-2                                                         |
|                   | Thyroid ultrasound                              | 76536                                                           |
|                   | Thyroid nuclear medicine                        | 78012-14                                                        |
|                   | Parathyroid planar imaging                      | 78070-2                                                         |
| <b>Procedures</b> | Thyroid biopsy with imaging                     | 10022, 60100, 76940, 76942, 77012, 77021                        |
|                   | Thyroidectomy                                   | 60210, 60212, 60220, 60225, 60240, 60252, 60254, 60260, 60270-1 |
|                   | Aspiration of thyroid cyst                      | 60300                                                           |
|                   | Other procedure of the endocrine system         | 60699                                                           |
|                   | Clinical brachytherapy radiation treatment      | 77750                                                           |
|                   | Radiopharmaceutical therapy oral administration | 79005                                                           |

**eTable 4.** Cascade visits

| <b>Index Test</b> | <b>Specialties</b>                                                                                                                                                                                                                                   | <b>Codes</b>                                         |
|-------------------|------------------------------------------------------------------------------------------------------------------------------------------------------------------------------------------------------------------------------------------------------|------------------------------------------------------|
| <b>ECG</b>        | Cardiology, Cardiac Electrophysiology, Interventional Cardiology, Pulmonology, Cardiac Surgery, Thoracic Surgery                                                                                                                                     | 6, 21, 29, 33, 78, C3                                |
| <b>UA</b>         | Hematology, Hematology/Oncology, Medical Oncology, Surgical Oncology, Radiational Oncology, Gynecologic Oncology, Pulmonology, Gastroenterology, Urology, Nephrology, Infectious Disease, Rheumatology, Thoracic Surgery, General/Colorectal Surgery | 2, 10, 28, 29, 33, 34, 39, 44, 66, 82, 83, 90-92, 98 |
| <b>TSH</b>        | Hematology/Oncology, Medical Oncology, Surgical Oncology, Radiational Oncology, Endocrinology, General Surgery, Otolaryngology                                                                                                                       | 2, 4, 46, 83, 90-92                                  |

**eTable 5.** Cascade hospitalizations

### **A. Electrocardiogram**

| <b>Hospitalization diagnosis</b> | <b>Primary diagnosis codes</b>                                                      |
|----------------------------------|-------------------------------------------------------------------------------------|
| Structural heart disease         | 395.2, 396.3, 423.9, 424.0-1, 428.0, 428.21, 428.23, 428.31, 428.33, 428.43, 429.83 |
| Ischemic heart disease           | 410.11, 410.21, 410.41, 410.71-2, 410.81, 410.91, 411.1, 414.00-1                   |
| Arrhythmia                       | 426.0, 426.4, 426.6, 427.1, 426.12-3, 427.31-2, 427.81, 427.89                      |
| Abnormal cardiac study           | 746.89, 794.39                                                                      |

### **B. Urinalysis**

| <b>Hospitalization diagnosis</b>          | <b>Primary diagnosis codes</b>                                                                                        |
|-------------------------------------------|-----------------------------------------------------------------------------------------------------------------------|
| Benign mass                               | 220, 211.3, 235.2, 239.5, 620.2, 621.4, 751.0                                                                         |
| Malignancy                                | 152.0, 153.3-4, 153.9-4.1, 156.0, 157.0-2, 157.9, 180.9, 182.0, 183.0, 184.4, 188.9-9.0, 197.6, 198.7, 198.82, 209.03 |
| Genitourinary (GU) infection/inflammation | 446.4, 599.0, 614.3, 590.80                                                                                           |
| Calculus/obstruction                      | 592.0-1, 593.4, 593.9, 574.10, 574.50                                                                                 |
| Abnormal GU study                         | 620.9, 596.89                                                                                                         |

### C. Thyrotropin test

| Hospitalization diagnosis | Primary diagnosis codes |
|---------------------------|-------------------------|
| Panhypopituitarism        | 253.2                   |
| Abnormal thyroid study    | 253.6                   |

**eTable 6.** Cascade new diagnoses (defined as a diagnosis that appears in one inpatient or two outpatient claims during the cascade period but does NOT appear in in one inpatient or two outpatient claims during the year prior to the index event)

### A. Electrocardiogram

| Cascade new diagnosis       | ICD-9 Codes                                                                                                                                                                                                  |
|-----------------------------|--------------------------------------------------------------------------------------------------------------------------------------------------------------------------------------------------------------|
| Ischemic heart disease      | 410, 410.0-1, 410.00-2, 410.10-2, 410.20-2, 410.30-2, 410.40-2, 410.50-2, 410.60-2, 410.70-2, 410.80-2, 410.90-2, 411.0-1, 411.81, 411.89, 412, 413.0-1, 413.9, 414.00-7, 414.10-2, 414.19, 414.2-4, 414.8-9 |
| Heart failure               | 398.91, 402.01, 402.11, 402.91, 404.01, 404.03, 404.11, 404.13, 404.91, 404.93, 428.0-1, 428.9, 428.20-3, 428.30-3, 428.40-3                                                                                 |
| Valvular/structural disease | 394.0-2, 394.9, 395.0-2, 395.9, 396.0-3, 396.8-9, 397.0-1, 397.9, 403.01, 403.91, 421.2, 424.0-3                                                                                                             |
| Arrhythmia                  | 426.0, 426.10-13, 426.2-7, 426.50-4, 426.81-2, 426.89, 426.9, 427.0-2, 427.9, 427.31-2, 427.41-2, 427.60-1, 427.69, 427.81, 427.89                                                                           |

## B. Urinalysis

| Cascade new diagnosis                                                                                                                         | ICD-9 codes                                                                                                                                                                                                                              |
|-----------------------------------------------------------------------------------------------------------------------------------------------|------------------------------------------------------------------------------------------------------------------------------------------------------------------------------------------------------------------------------------------|
| Tuberculosis, Chlamydia, Gonorrhea                                                                                                            | 016.00-06, 799.8, 980                                                                                                                                                                                                                    |
| Gastrointestinal malignancy (colon, liver, pancreatic)                                                                                        | 153.0-4.1, 155.0, 155.1, 157.9, 230.3-4                                                                                                                                                                                                  |
| Genitourinary (GU) tract malignancy                                                                                                           | 188.9, 189.0, 189.9, 194.0, 236.91, 237.2                                                                                                                                                                                                |
| Benign gastrointestinal mass                                                                                                                  | 211.1, 211.3, 211.5, 211.6, 577.2                                                                                                                                                                                                        |
| Benign genitourinary tract mass                                                                                                               | 223.0, 220, 227.0                                                                                                                                                                                                                        |
| Hemangioma                                                                                                                                    | 228.00, 228.02, 228.04, 228.09                                                                                                                                                                                                           |
| Splenic cyst                                                                                                                                  | 289.59                                                                                                                                                                                                                                   |
| Adrenal disorder                                                                                                                              | 255.8                                                                                                                                                                                                                                    |
| Renal glycosuria                                                                                                                              | 271.4                                                                                                                                                                                                                                    |
| Monoclonal paraproteinemia                                                                                                                    | 273.1                                                                                                                                                                                                                                    |
| Amyloidosis                                                                                                                                   | 277.30, 277.39                                                                                                                                                                                                                           |
| Renal disease                                                                                                                                 | 403.01, 403.11, 403.91, 404.01-3, 404.11-3, 404.91-3, 446.21, 580.0, 580.4, 580.81, 580.89, 580.9-13, 581.81, 581.89, 581.9-2.2, 582.4, 582.81, 582.89, 582.9-3.2, 583.4, 583.6-7, 583.81, 583.89, 583.9, 585.9, 587, 588.89, 588.9, 591 |
| Diverticulosis                                                                                                                                | 562.10                                                                                                                                                                                                                                   |
| Liver disease                                                                                                                                 | 571.0, 571.2, 571.5, 571.8                                                                                                                                                                                                               |
| Hepatitis                                                                                                                                     | 573.3                                                                                                                                                                                                                                    |
| Gallbladder disease                                                                                                                           | 574.1-2, 574.7, 574.9                                                                                                                                                                                                                    |
| Nephrolithiasis, ureteral calculus                                                                                                            | 592.0-1                                                                                                                                                                                                                                  |
| Renal cyst                                                                                                                                    | 593.2, 753.10, 753.12-14, 753.16-7, 753.19                                                                                                                                                                                               |
| GU inflammation / infection (including cystitis, pyelonephritis, urethritis, prostatitis, orchitis/epididymitis, pelvic inflammatory disease) | 590.8, 595.0, 597.80, 599.0, 601.9, 604.90, 614.90                                                                                                                                                                                       |
| Hematuria                                                                                                                                     | 599.70                                                                                                                                                                                                                                   |
| Proteinuria                                                                                                                                   | 791.0                                                                                                                                                                                                                                    |
| Prostate cyst                                                                                                                                 | 600.3                                                                                                                                                                                                                                    |
| Gastrointestinal vessel anomaly                                                                                                               | 747.61                                                                                                                                                                                                                                   |
| Meckel's diverticulum                                                                                                                         | 751.0                                                                                                                                                                                                                                    |
| Liver cyst                                                                                                                                    | 751.60-2, 573.8                                                                                                                                                                                                                          |
| Renal dysplasia                                                                                                                               | 753.15, 753.20-2, 753.29                                                                                                                                                                                                                 |
| Ureterocele                                                                                                                                   | 753.23                                                                                                                                                                                                                                   |
| Lymph node enlargement                                                                                                                        | 785.6                                                                                                                                                                                                                                    |
| Pulmonary nodule                                                                                                                              | 793.11, 793.19                                                                                                                                                                                                                           |
| Abnormal kidney function study                                                                                                                | 794.4                                                                                                                                                                                                                                    |

### C. Thyrotropin test

| Cascade new diagnosis           | ICD-9 codes                                                          |
|---------------------------------|----------------------------------------------------------------------|
| Thyroid cancer                  | 193                                                                  |
| Thyroid nodules, goiter         | 226, 240.0, 241.0, 241.1, 241.9, 242.20-1, 242.30-1, 242.40-1, 246.1 |
| Pituitary adenoma               | 227.3                                                                |
| Endocrine tumor                 | 237.4                                                                |
| Hypothyroidism                  | 243, 244.0, 244.8-9                                                  |
| Hyperthyroidism                 | 242.00, 242.01, 242.10, 242.80-81, 242.90-91                         |
| Thyroiditis                     | 245.0-4, 245.8-9                                                     |
| Other thyroid disorder          | 246.0, 246.8-9                                                       |
| Euthyroid sick syndrome         | 790.94                                                               |
| Thyroid cyst                    | 246.2                                                                |
| Thyroid hemorrhage/infarction   | 246.3                                                                |
| Panhypopituitarism              | 253.2                                                                |
| Hyperparathyroidism             | 252.0                                                                |
| Hypoparathyroidism              | 252.1                                                                |
| Multiple endocrine neoplasia    | 258.01-3                                                             |
| Abnormal thyroid function study | 794.5                                                                |

### Covariates

**eTable 7: Primary care physician specialty codes**

| Specialty           | Specialty code |
|---------------------|----------------|
| General practice    | 01             |
| Family practice     | 08             |
| Internal medicine   | 11             |
| Pediatric medicine  | 37             |
| Geriatric medicine  | 38             |
| Preventive medicine | 84             |

Specialty codes used to identify specialty of physician providing Annual Wellness Visit. All other specialties as well as physician assistants and nurse practitioners (for whom specialties are not listed in Medicare data) were included as "other."

### eAppendix 4. Cascade-attributable event analysis

**Estimation of cascade-attributable event rates** - We estimated event rates for the exposure and comparison groups using the parameters of the Poisson model to calculate the predicted mean rate for an average patient on the log-scale, and then back-transformed to get adjusted event rates for each group. These two rates were then subtracted to get the rate difference, or adjusted cascade-attributable event rate, for which confidence intervals were calculated based on the p-value of the Intervention effect in the Poisson model (using a standard error consistent with the original p-value and the estimated rate difference).

**eResults**

**eTable 8. Prevalence of routine tests among Annual Wellness Visits, by problem based visit co-billed status**

| Routine test | AWV co-billed with problem based visit |                   |
|--------------|----------------------------------------|-------------------|
|              | Yes, %<br>N=17,270                     | No, %<br>N=58,005 |
| Any test     | 27.7                                   | 15.9              |
| ECG          | 11.3                                   | 6.0               |
| UA           | 15.9                                   | 8.2               |
| TSH          | 13.9                                   | 7.1               |

**eFigure 3. Physician test ordering patterns**

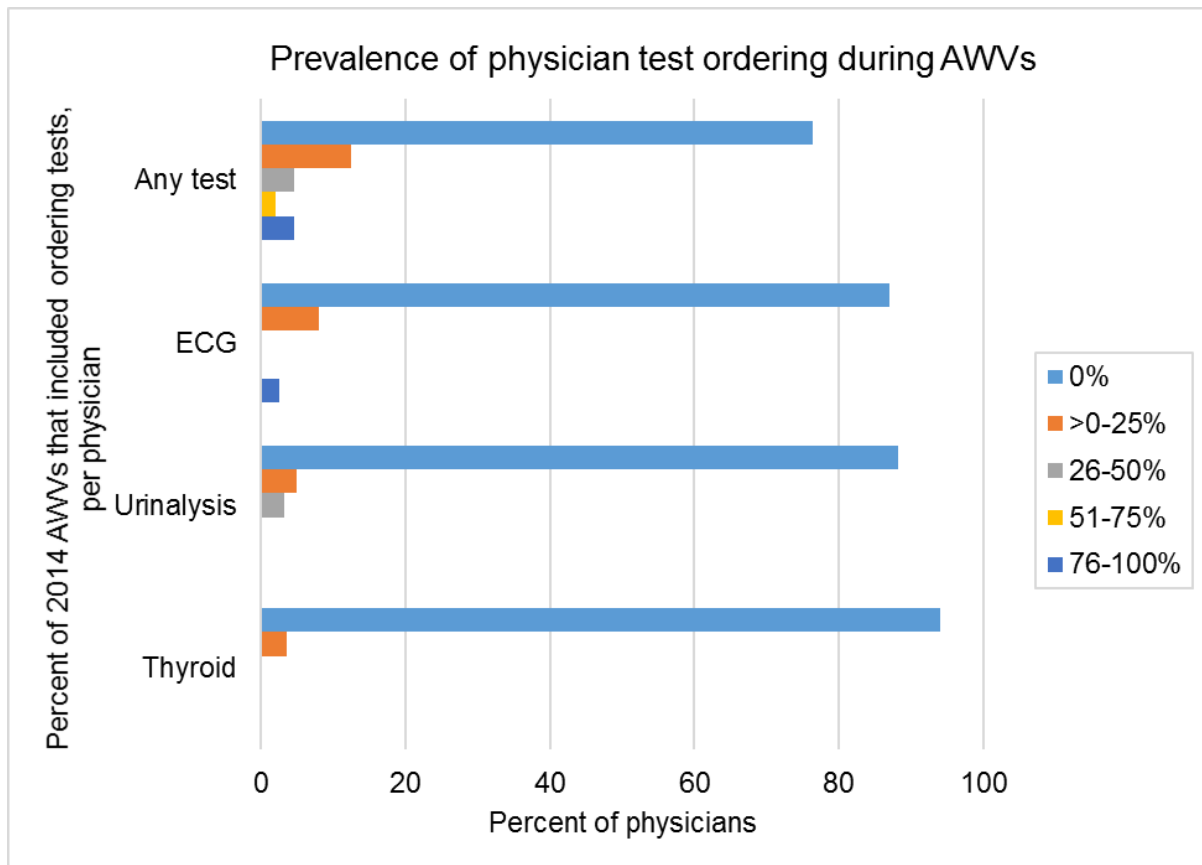

Test ordering patterns among the 599 clinicians (defined by National Provider Identifier) who performed at least 10 Annual Wellness Visits in 2014.

**eTable 9.** Cascade-Attributable Event Rates and Spending Following Routine Testing During Annual Wellness Visits, Sensitivity Analysis in Which Index Tests Included as Cascade Events

| Event rate per 100 beneficiaries                                                                                   | Adjusted cascade-attributable event rate (95%CI) |                   |                      |
|--------------------------------------------------------------------------------------------------------------------|--------------------------------------------------|-------------------|----------------------|
|                                                                                                                    | ECG                                              | UA                | TSH                  |
| All events                                                                                                         | 4.92 (3.34, 6.49)                                | 6.41 (5.07, 7.75) | -3.72 (-4.59, -2.85) |
| Laboratory tests                                                                                                   | 0.62 (-0.27, 1.50)                               | 2.86 (1.90, 3.81) | -2.72 (-3.27, -2.17) |
| Imaging                                                                                                            | 0.50 (-0.45, 1.44)                               | 1.05 (0.54, 1.57) | -0.21 (-0.39, -0.04) |
| Procedures                                                                                                         | 1.93 (1.42, 2.44)                                | 0.67 (0.32, 1.02) | -0.26 (-0.54, 0.01)  |
| Visits                                                                                                             | 1.29 (0.86, 1.72)                                | 1.34 (0.76, 1.92) | 0.21 (-0.29, 0.70)   |
| New diagnoses                                                                                                      | 0.47 (0.16, 0.78)                                | 0.36 (0.07, 0.65) | -0.04 (-0.18, 0.10)  |
| Allowable charges related to cascade events in 90-day period excluding hospitalizations, \$ mean (SD) <sup>c</sup> | 9.48 (6.23, 12.72)                               | 7.51 (5.15, 9.87) | -0.73 (-1.78, 0.32)  |

Results adjusted for patient age, sex, race, Medicaid, disability, Elixhauser condition count, residential setting, region, area-level income, ACO participation, specialty of clinician performing visit, visit co-billed status, and HRR random effects (as in main analyses).

**eTable 10.** Cascade-Attributable Event Rates and Spending Following Routine Testing During Annual Wellness Visits, Sensitivity Analysis Adjusted for Receipt of Other Routine Tests

| Event rate per 100 beneficiaries                                                                                   | Adjusted cascade-attributable event rate (95%CI) |                   |                     |
|--------------------------------------------------------------------------------------------------------------------|--------------------------------------------------|-------------------|---------------------|
|                                                                                                                    | ECG                                              | UA                | TSH                 |
| All events                                                                                                         | 6.18 (4.82, 7.54)                                | 4.57 (3.38, 5.76) | 0.28 (-0.66, 1.22)  |
| Laboratory tests                                                                                                   | 0.68 (-0.20, 1.56)                               | 1.19 (0.53, 1.85) | 0.90 (0.38, 1.42)   |
| Imaging                                                                                                            | 1.59 (1.04, 2.13)                                | 0.94 (0.41, 1.48) | -0.18 (-0.39, 0.02) |
| Procedures                                                                                                         | 1.92 (1.42, 2.43)                                | 0.83 (0.45, 1.21) | -0.09 (-0.44, 0.26) |
| Visits                                                                                                             | 1.25 (0.82, 1.67)                                | 1.15 (0.55, 1.75) | -0.17 (-0.72, 0.38) |
| New diagnoses                                                                                                      | 0.47 (0.16, 0.78)                                | 0.46 (0.14, 0.77) | 0.17 (-0.06, 0.40)  |
| Allowable charges related to cascade events in 90-day period excluding hospitalizations, \$ mean (SD) <sup>c</sup> | 9.59 (6.40, 12.78)                               | 6.68 (4.24, 9.13) | -0.32 (-1.54, 0.89) |

Results adjusted for patient age, sex, race, Medicaid, disability, Elixhauser condition count, residential setting, region, area-level income, ACO participation, specialty of clinician performing visit, visit co-billed status, HRR random effects (as in main analyses), as well as patient receipt of two other common routine tests: complete blood count (CPT codes: 85025, 85027) and metabolic panel (CPT codes: 80048, 80053, 80076).

**eTable 11.** Index Test and Cascade-Attributable Event Rates Following Routine Testing During Annual Wellness Visits, Sensitivity Analysis Using Test-Specific Cohorts

|                                                                       | <b>ECG<br/>(N = 174,171)</b> | <b>UA<br/>(N = 463,273)</b> | <b>TSH<br/>(N = 292,773)</b> |
|-----------------------------------------------------------------------|------------------------------|-----------------------------|------------------------------|
| Index tests, (%)                                                      | 18,953 (10.9%)               | 84,322 (18.2%)              | 44,472 (15.2%)               |
| <b>Cascade-attributable event rate per 100 beneficiaries (95% CI)</b> |                              |                             |                              |
| All events                                                            | 3.41 (2.64, 4.18)            | 2.63 (2.21, 3.04)           | -0.53 (-0.84, -0.22)         |
| Laboratory tests                                                      | 0.36 (-0.15, 0.87)           | 1.24 (0.98, 1.51)           | -0.36 (-0.49, -0.22)         |
| Imaging                                                               | 1.10 (0.79, 1.41)            | 0.47 (0.28, 0.66)           | -0.02 (-0.10, 0.06)          |
| Procedures                                                            | 1.00 (0.70, 1.30)            | 0.33 (0.21, 0.45)           | -0.15 (-0.27, -0.02)         |
| Visits                                                                | 0.85 (0.60, 1.10)            | 0.41 (0.22, 0.59)           | 0.19 (-0.03, 0.40)           |
| New diagnoses                                                         | 0.21 (0.03, 0.38)            | 0.08 (-0.01, 0.17)          | -0.01 (-0.06, 0.04)          |

Results adjusted for patient age, sex, race, Medicaid, disability, Elixhauser condition count, residential setting, region, area-level income, ACO participation, specialty of clinician performing visit, visit co-billed status, and HRR random effects (as in main analyses).

## eReferences

1. Society of General Internal Medicine. Choosing Wisely: General Health Checks for Asymptomatic Adults. <https://www.choosingwisely.org/clinician-lists/society-general-internal-medicine-general-health-checks-for-asymptomatic-adults/>. Published 2013. Accessed July 11, 2019.
2. Society of General Internal Medicine. Health Checkups. <https://www.choosingwisely.org/patient-resources/health-checkups/>. Published 2013. Accessed July 11, 2019.
